# Supplementary material for: Production and growth of new particles during two cruise campaigns in the marginal seas of China
Source: Copernicus journal article supplement (doi:10.5194/acp-14-7941-2014), 2014-08-11
Supplement: Supplementary file 1 [file acp-14-7941-2014-supplement.pdf]

Supplement of Atmos. Chem. Phys., 14, 7941–7951, 2014  
<http://www.atmos-chem-phys.net/14/7941/2014/>  
doi:10.5194/acp-14-7941-2014-supplement  
© Author(s) 2014. CC Attribution 3.0 License.

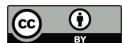

Atmospheric  
Chemistry  
and Physics  
Open Access

The logo for Atmospheric Chemistry and Physics, featuring a stylized globe with a grid pattern and a vertical line through it, enclosed in a circle.

*Supplement of*

## **Production and growth of new particles during two cruise campaigns in the marginal seas of China**

**X. H. Liu et al.**

*Correspondence to:* X. H. Yao (xhyao@ouc.edu.cn) and M. Zheng (mzheng@pku.edu.cn)

1 **Support figures**

2 **Figure S1** Particle size distribution in marine atmosphere. (a:16 October to 5  
3 November 2011, b:2 to 11 November 2012).

4 **Figure S2** Comparison of median diameter of particle mode ( $D_{pg,1}$ ) and number  
5 concentrations of nucleation mode particles ( $N_{<30nm}$ ) between two sites on 4  
6 November 2012.

7 **Figure S3** New particle formation on 18 October 2011 deducted of the ship plumes.

8 **Figure S4** Variations of median diameter of preexisting particle mode ( $D_{pg,2}$ ) and  
9 number concentrations of median diameter particles ( $N_i$ ) of particle growth event over  
10 China Seas on 26 October, 2011.

11 **Figure S5** Variations of  $PM_{0.1}$ ,  $NH_4^+$ ,  $NO_3^-$  and  $SO_4^{2-}$  concentrations during 5 new  
12 particle formation events.

13 **Figure S6** MODIS derived chlorophyll a oceanic concentrations on 26 October 2011  
14 over China Seas (pentacle represents the location of new particle burst event).

15 **Figure S7** Variations of semi-volatility and non-volatility SOA concentrations during  
16 5 new particle formation events.

17 **Figure S8** Schematic of CMAQv4.7 SOA module.

18

19 **Table S1** Acronym and definition of each SOA species in CMAQ 4.7.1

20

21

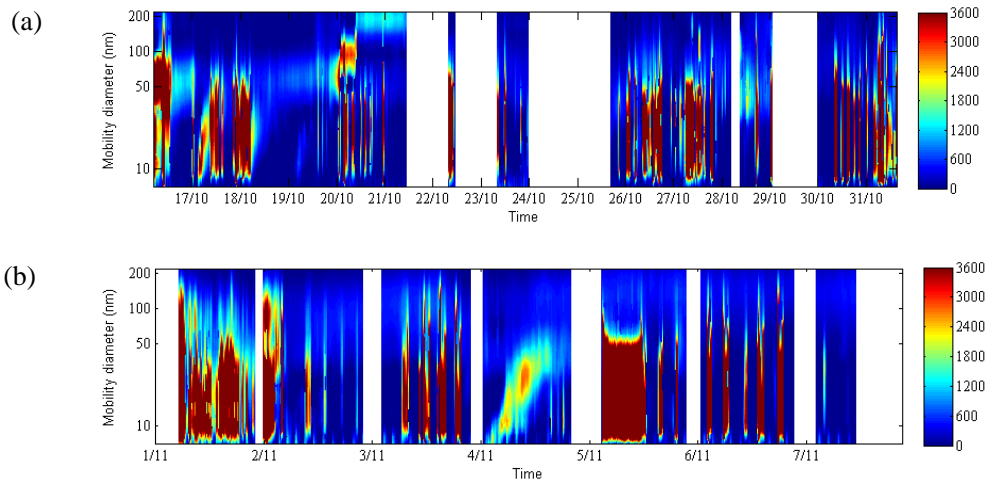

22 **Figure S1** Particle size distribution in marine atmosphere. (a:16 October to 5  
23 November 2011, b:2 to 11 November 2012).

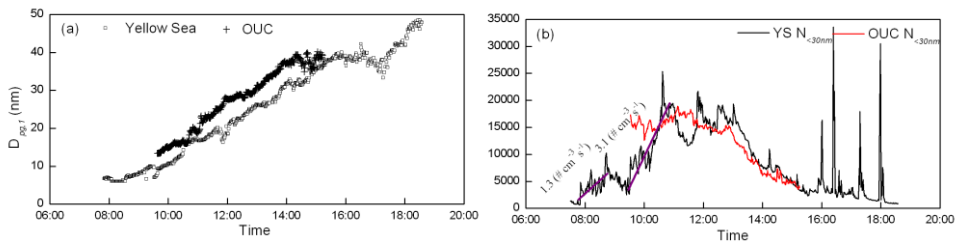

24  
25 **Figure S2** Comparison of median diameter of particle mode ( $D_{pg,1}$ ) and number  
26 concentrations of nucleation mode particles ( $N_{<30nm}$ ) between two sites on 4  
27 November 2012.

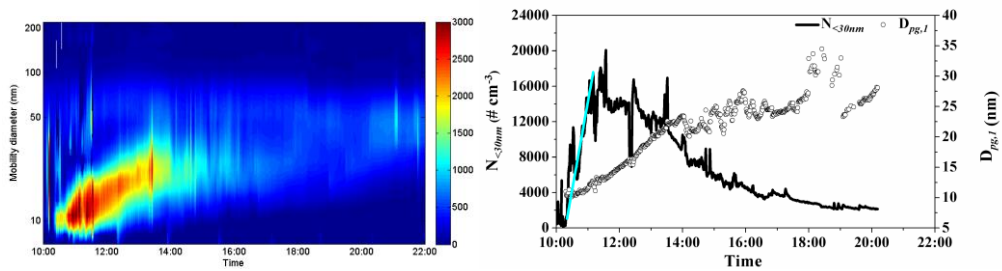

28  
29 **Figure S3** New particle formation on 18 October 2011 deduced of the ship plumes.

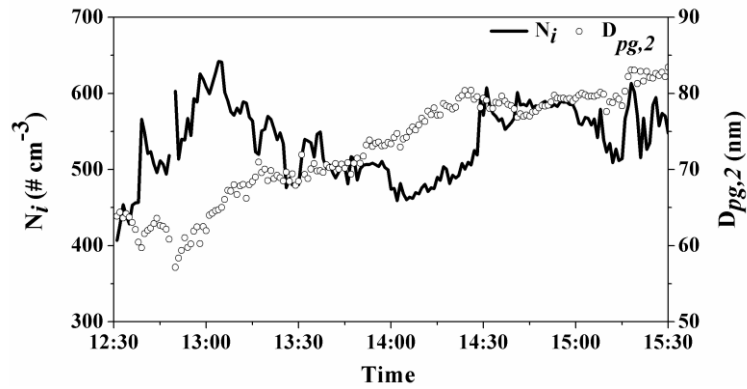

30

31 **Figure S4** Variations of median diameter of preexisting particle mode ( $D_{pg,2}$ ) and  
 32 number concentrations of median diameter particles ( $N_i$ ) of particle growth event over  
 33 China Seas on 26 October 2011.

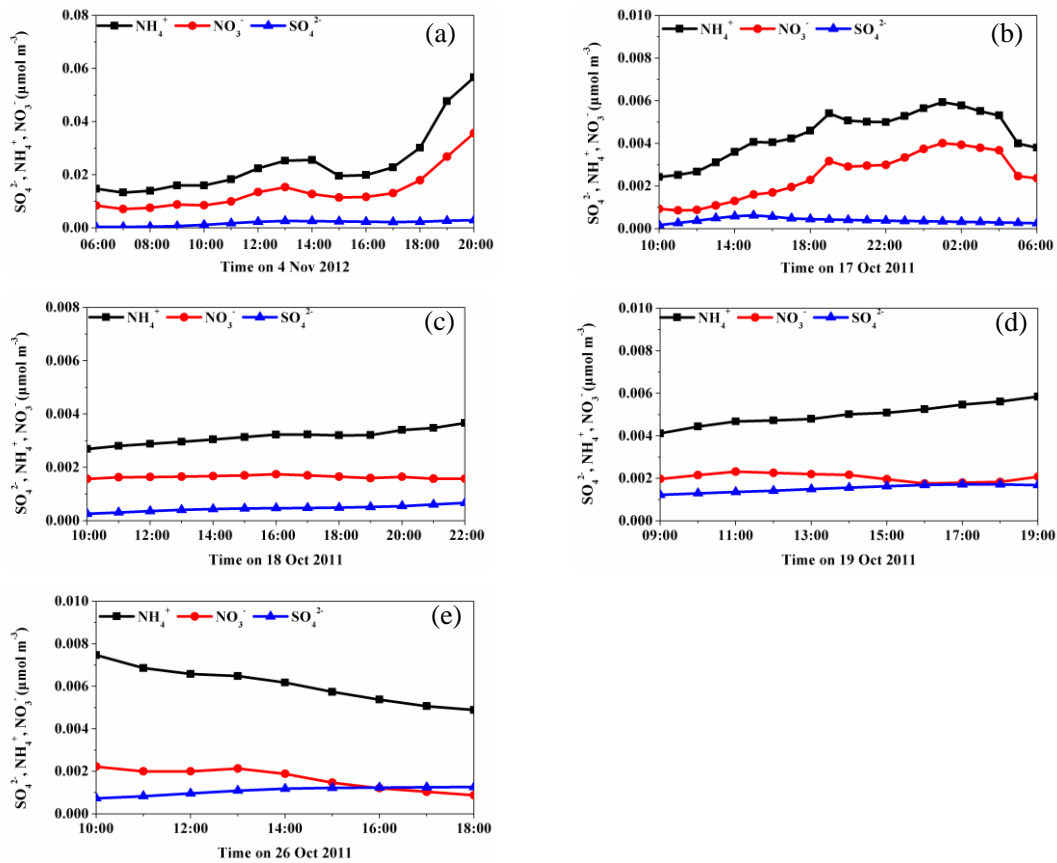

34 **Figure S5** Variations of  $PM_{0.1}$   $NH_4^+$ ,  $NO_3^-$  and  $SO_4^{2-}$  concentrations during 5 new  
 35 particle formation events (Due to the lack of evaluation about the simulated  $PM_{0.1}$   
 36 species with observations and SOA only distributed in  $PM_{0.1-2.5}$  in modeling results,  
 37 we chose  $PM_{2.5}$   $NH_4^+$ ,  $NO_3^-$  and  $SO_4^{2-}$  in the text but not  $PM_{0.1}$   $NH_4^+$ ,  $NO_3^-$  and  $SO_4^{2-}$ .  
 38 However, simulated species in  $PM_{0.1}$  could also support our analysis).

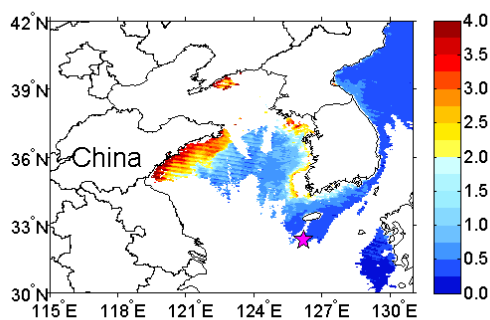

39  
40  
41  
42

**Figure S6** MODIS derived chlorophyll a oceanic concentrations on 26 October 2011 over China Seas (pentacle represents the location of new particle burst event).

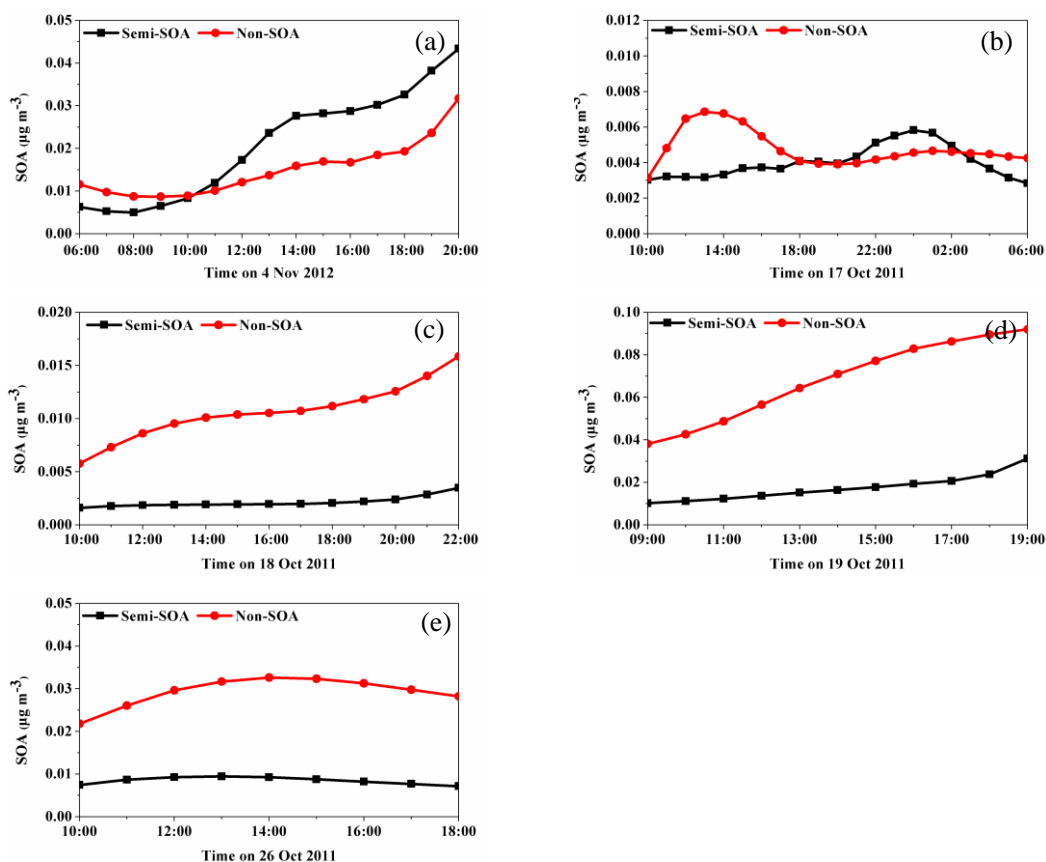

43  
44  
45  
46  
47  
48  
49

**Figure S7** Variations of semi-volatile and non-volatile SOA concentrations during 5 new particle formation events (Non-SOA includes ABNZ3, ATOL3, AXYL3, AOLGA, AISO3, AOLGB and AORGC, while Semi-SOA includes AALK, ABNZ1, ABNZ2, ATOL1, ATOL2, AXYL1, AXYL2, AISO1, AISO2, ATRP1, ATRP2 and ASQT. Due to the temperature-related characteristics, SOA volatility always varies with different conditions, therefore we chose total SOA concentrations in the text, however, different volatility SOA could also support our analysis).

## 50 **Supporting information**

### 51 **1. SOA simulation in CMAQ**

52 The U.S. EPA Community Multi-scale Air Quality Model (CMAQ v4.7.1; Byun and  
53 Ching, 1999) with the AE5 SOA module was used to simulate the processes of  
54 secondary organic aerosol formation during new particle burst events.

55

56 Related SOA formation reactions and SOA composition in CMAQ4.7.1 are shown in  
57 Figure S8 (Carlton et al., 2010). Table S1 provides the acronym and definition of each  
58 SOA species. The concentration of SOA in this study represents the sum of 19 species  
59 listed in Table S1. Four types (7 species) of were non-volatile SOA (Fig. S7 and S8),  
60 while other SOA species was treated as semi-volatile (Carlton et al., 2010).

61 **Table S1 Acronym and definition of each SOA species in CMAQ 4.7.1.**

| <b>Acronym</b> | <b>Definition</b>                                                      |
|----------------|------------------------------------------------------------------------|
| AALK           | Semi-volatile SOA from alkanes                                         |
| ABNZ1,ABNZ2    | Semi-volatile SOA from benzene                                         |
| ABNZ3          | Non-volatile SOA from benzene (low-NO <sub>x</sub> )                   |
| ATOL1,ATOL2    | Semi-volatile SOA from high-yield aromatics                            |
| ATOL3          | Non-volatile SOA from high-yield aromatics (low-NO <sub>x</sub> )      |
| AXYL1,AXYL2    | Semi-volatile SOA from low-yield aromatics                             |
| AXYL3          | Non-volatile SOA from low-yield aromatics (low-NO <sub>x</sub> )       |
| AOLGA          | Oligomers from anthropogenic SOA precursors                            |
| AISO1,AISO2    | Semi-volatile SOA from isoprene                                        |
| AISO3          | Acid-enhanced SOA from isoprene                                        |
| ATRP1, ATRP2   | Semi-volatile SOA from monoterpenes                                    |
| ASQT           | Semi-volatile SOA from sesquiterpenes                                  |
| AOLGB          | Oligomers from biogenic SOA precursors                                 |
| AORGC          | Non-volatile from aqueous-phase oxidation of glyoxal and methylglyoxal |

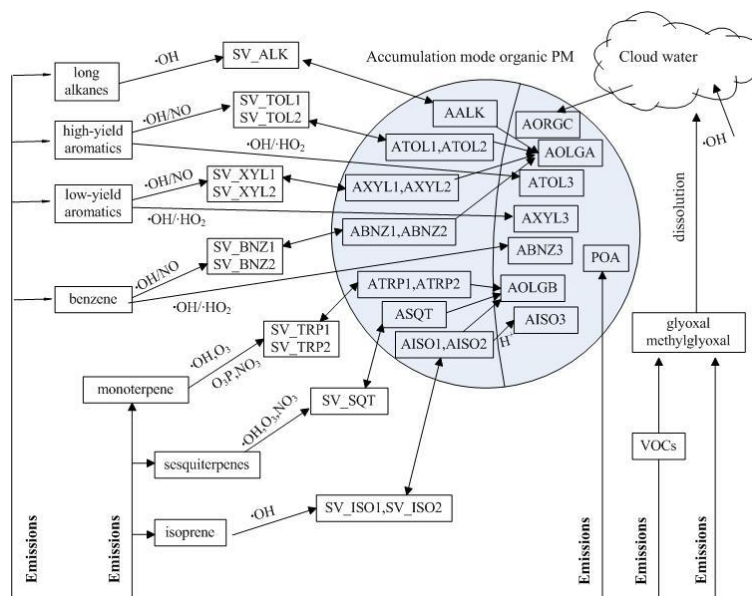

62  
63  
64 **Figure S8 Schematic of CMAQv4.7 SOA module (Carlton et al., 2010)**

65  
66 **2. An approach used to deduct the contribution of ship-emitted primary particles**

67  
68 The ship-emitted primary particles exhibited a uni-modal size distribution of their  
69 number concentrations in our two cruise campaign. The mode was distributed at  
70 25-29 nm. However, there was a small difference between these number concentration  
71 size distribution spectra, depending on the concentration. Thus, the measurements in  
72 low background number concentration days were used to establish a library of number  
73 concentration size distribution spectra of ship-emitted particles in various  
74 concentration levels.

75  
76 In the cruise campaign, the observed concentration some times reflects a combination  
77 of the contributions from new particle formation, ship-emitted particles and  
78 background particles. To deduct the contribution from ship emissions, the number  
79 concentration size distribution spectrum of ship-emitted particles with the  
80 concentration at 25-29 nm same as the observed particles at the size were selected.  
81 The observed number concentrations minus the values in the selected size distribution  
82 spectrum generated the concentrations of particles from new particle formation and  
83 background particles.

84 **References:**

85 Carlton, A.G., Bhawe, P.V., Napelenok, S.L., Edney, E.O., Sarwar, G., Pinder, R.W., Pouliot, G.A.  
86 and Houyoux, M.: Model representation of secondary organic aerosol in CMAQ v4.7,  
87 Environ. Sci. Technol., 24, 8553-8560, 2010.

88 Byun, D., Ching, J.: Science Algorithms of the EPA Models-3 Community Multiscale Air Quality  
89 (CMAQ) Modeling System, EPA Report 600/R-99/030, Washington DC, 1999,  
90 <http://www.epa.gov/asmdnerl/models3/doc/science/science.html>.
